# Supplementary material for: Regulation of mATG9 trafficking by Src- and ULK1-mediated phosphorylation in basal and starvation-induced autophagy
Source: PubMed Central journal article supplement — Cell Res. 2016 Dec 9;27(2):184–201. doi: 10.1038/cr.2016.146 (PMC5339848; doi:10.1038/cr.2016.146), 2016-12-09
Supplement: cr2016146x5.pdf [file cr2016146x5.pdf]

## Supplementary information, Figure S5

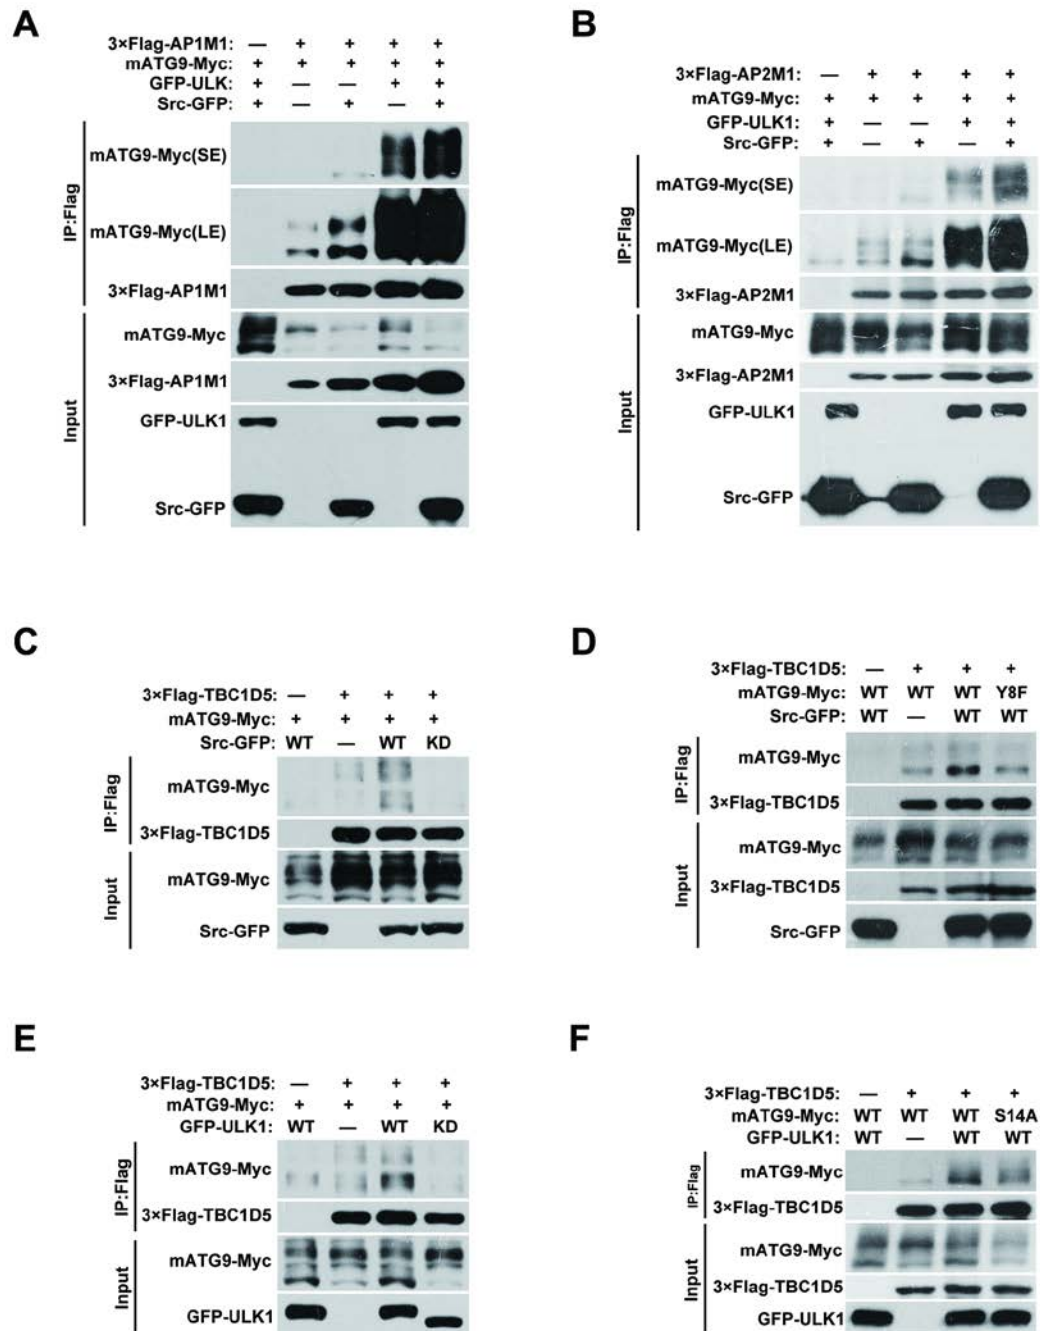

**Figure S5** Phosphorylation of Y8 and S14 promotes mATG9 trafficking and interaction with TBC1D5. (A, B) HEK293T cells were co-transfected with mATG9-Myc, 3×Flag-AP1/2M1 and GFP vector, Src-GFP and/or GFP-ULK1 for 24 h, and then collected for immunoprecipitation with anti-Flag antibody. (C) HEK293T

cells were co-transfected with mATG9-Myc, 3×Flag-TBC1D5 and Src-GFP or KDSrc-GFP for 24 h, and then collected for immunoprecipitation with anti-Flag antibody. **(D)** HEK293T cells were co-transfected with WT mATG9-Myc or the Y8F mutant, 3×Flag-TBC1D5 and Src-GFP for 24 h, and then collected for immunoprecipitation with anti-Flag antibody. **(E)** HEK293T cells were co-transfected with mATG9-Myc, 3×Flag-TBC1D5 and GFP-ULK1 or KD GFP-ULK1 for 24 h, and then collected for immunoprecipitation with anti-Flag antibody. **(F)** HEK293T cells were co-transfected with WT mATG9-Myc or S14A mutant, 3×Flag-TBC1D5 and GFP-ULK1 for 24 h, and then collected for immunoprecipitation with anti-Flag antibody.
