# Supplementary material for: Regulation of mATG9 trafficking by Src- and ULK1-mediated phosphorylation in basal and starvation-induced autophagy
Source: PubMed Central journal article supplement — Cell Res. 2016 Dec 9;27(2):184–201. doi: 10.1038/cr.2016.146 (PMC5339848; doi:10.1038/cr.2016.146), 2016-12-09
Supplement: cr2016146x6.pdf [file cr2016146x6.pdf]

## Supplementary information, Figure S6

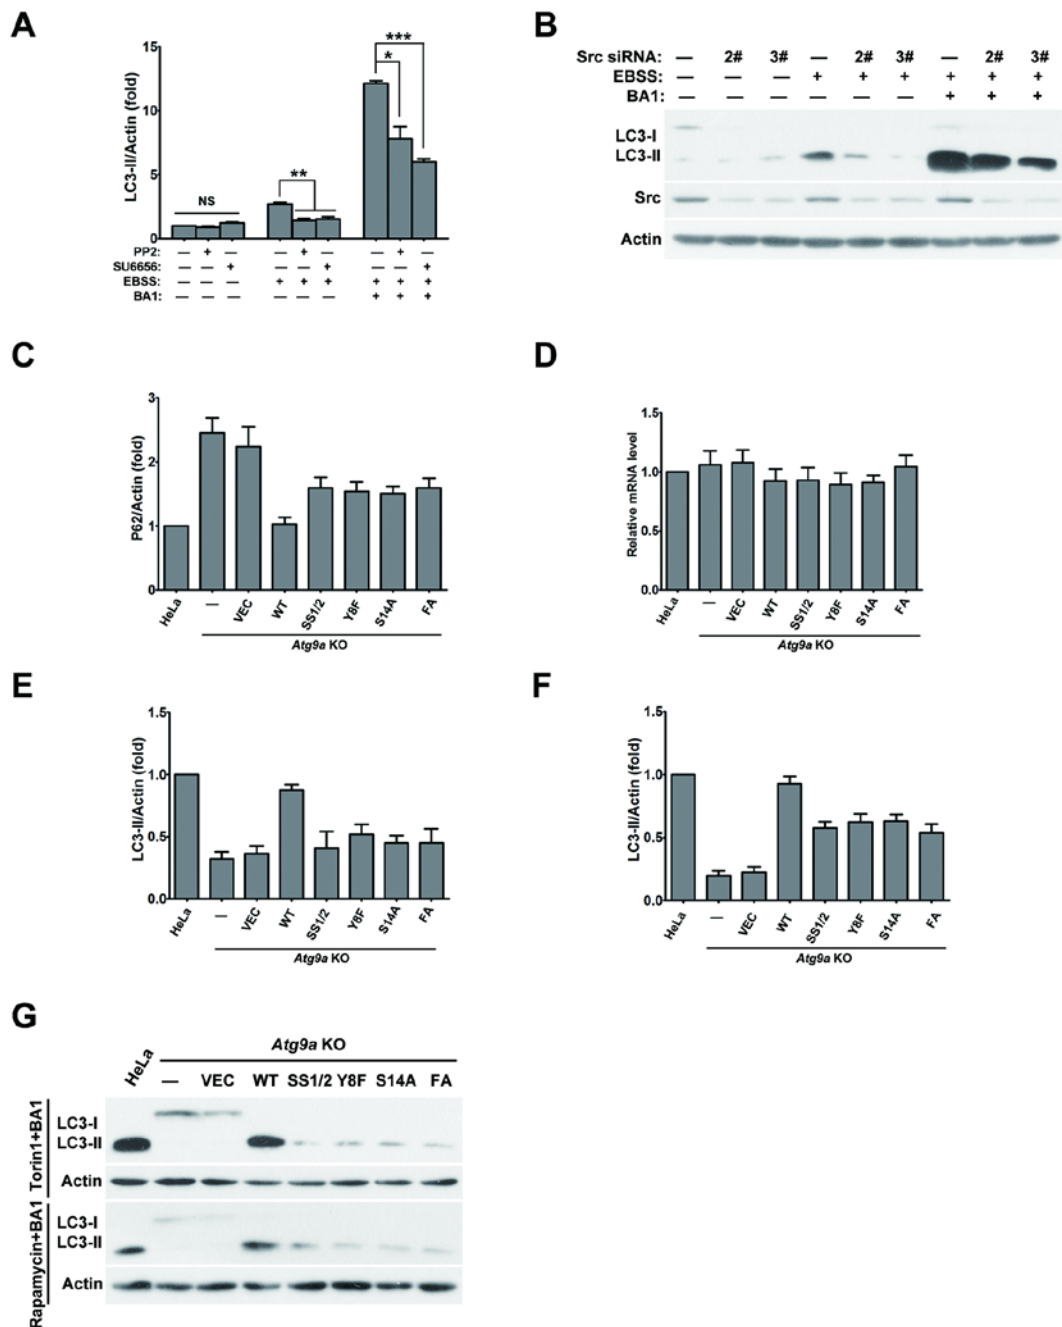

**Figure S6** Phosphorylation of mATG9 is essential for basal and starvation-induced autophagy. **(A)** Quantitative analysis of the LC3-II protein levels in **Figure 7C** by Image J (normalized to actin). **(B)** HeLa cells were transfected with scrambled or Src targeted siRNA for 72 h, and then treated with or without EBSS starvation for 2 h in the presence or absence of the lysosome inhibitor BA1 (Bafilomycin A1, 20 nM). **(C)**

Quantitative analysis of the P62 protein levels in **Figure 7F** by Image J (normalized to actin). **(D)** The mRNA levels of P62 in the indicated cells were analyzed by RT-qPCR. **(E)** Quantitative analysis of the LC3-II protein levels in **Figure 7C** upper panel by Image J (normalized to actin). **(F)** Quantitative analysis of the LC3-II protein levels in **Figure 7C** lower panel by Image J (normalized to actin). **(G)** *Atg9a* KO HeLa cells stable reconstituted with wild-type mATG9 or the indicated mutants were treated with mTORC1 inhibitors Torin1 (1  $\mu$ M) or Rapamycin (1  $\mu$ M) for 2 h in the presence of the lysosome inhibitor BA1 (20 nM).
