# Supplementary figures and images for: Regulation of mATG9 trafficking by Src- and ULK1-mediated phosphorylation in basal and starvation-induced autophagy
Source: PubMed Central journal article supplement — Cell Res. 2016 Dec 9;27(2):184–201. doi: 10.1038/cr.2016.146 (PMC5339848; doi:10.1038/cr.2016.146), 2016-12-09

## Supplementary information, Figure S2

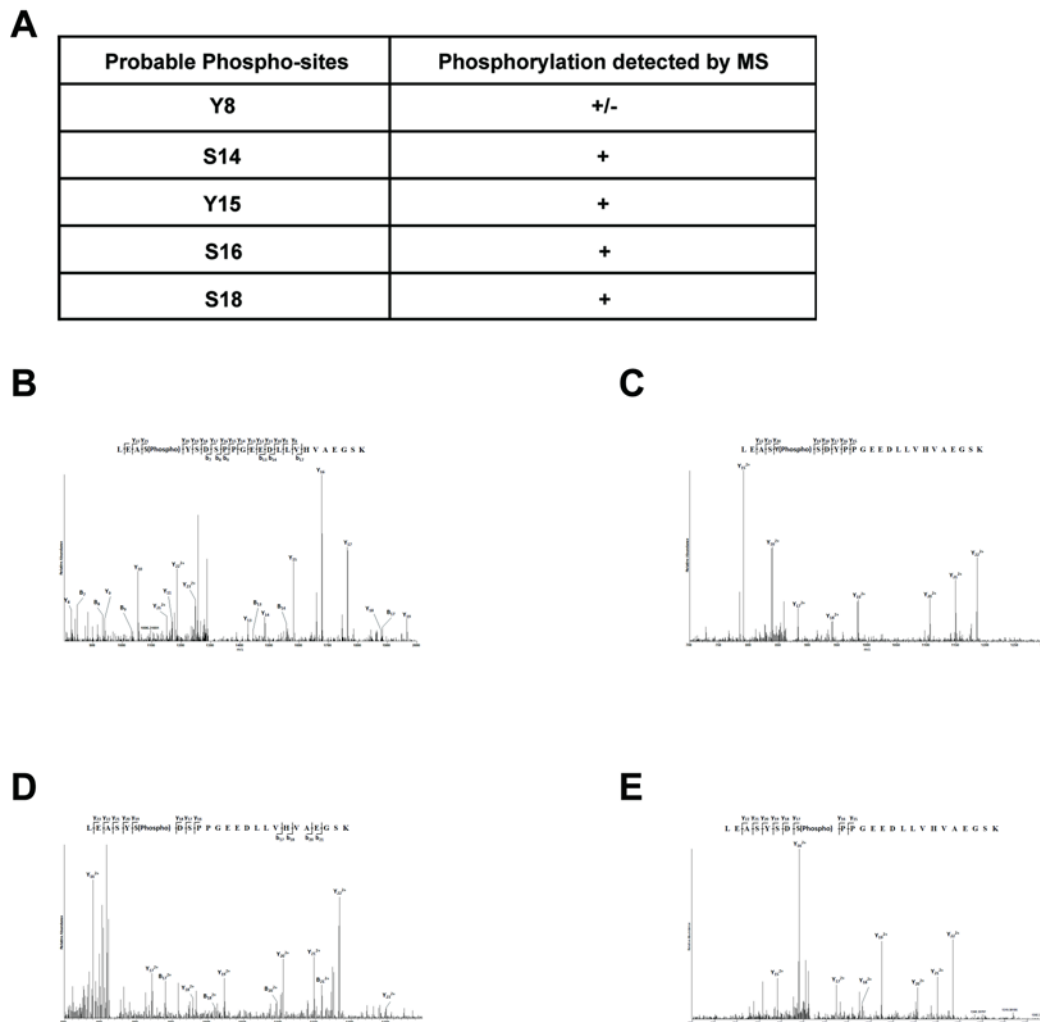

Supplement: cr2016146x2.pdf [file cr2016146x2.pdf]
